# Supplementary material
Source: Research Square preprint supplement (doi:10.21203/rs.3.rs-9639337/v1)
Supplement: Supplementary file 1 [file 18b825c10caffb951bd2633f.docx]

**Microscopic connectome-based disease epicenter diffusion patterns in early-onset schizophrenia**

**Running title: Microscale EOS epicenters of structural deviations**

Yun-Shuang Fan a,b#, Wenfeng Jing a,b#, Yong Xu c, Liju Liu a,b, Maowei Ye a,b, Mi Yang a*, Jing Guo a,b*, Huafu Chen a,b*

a The Clinical Hospital of Chengdu Brain Science Institute, School of Life Science and Technology, University of Electronic Science and Technology of China, Chengdu, China;

b MOE Key Lab for Neuroinformation, Brain-Computer Interface & Brain-Inspired Intelligence Key Laboratory of Sichuan Province, University of Electronic Science and Technology of China, Chengdu, China;

c Department of Clinical Psychology, The Eighth Affiliated Hospital, Sun Yat-Sen University, Shenzhen, China;

# Co-first authors;

* Corresponding authors:

Huafu Chen, E-mail: [chenhf@uestc.edu.cn](mailto:chenhf@uestc.edu.cn) & Jing Guo, E-mail: [jingguo@uestc.edu.cn](mailto:jingguo@uestc.edu.cn) & Mi Yang, E-mail: 565136170@qq.com

Title character count: 86

Running title character count: 50

Word count of abstract: 200

Word count of text body: 4388

Number of references: 51

Number of tables: 0

Number of figures: 4 (All colored)

Supplement material: 1

**Supplementary Data**


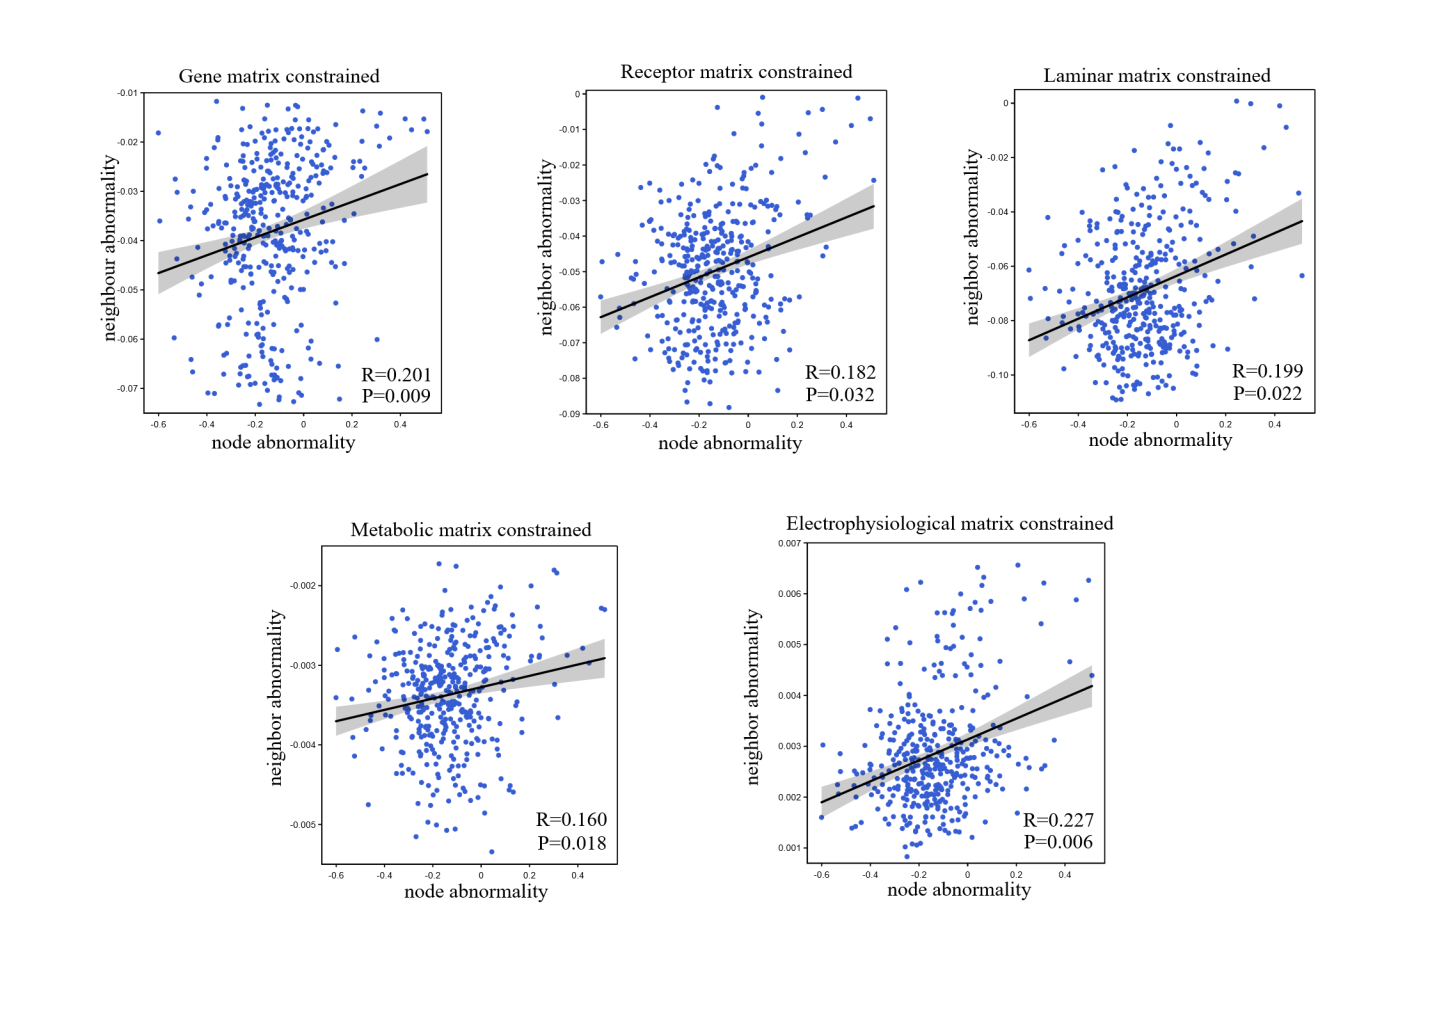


**Figure S1: Adjacency node deviation correlation for each specific modal network**

**Table S1. Specific brain regions corrected by FDR**

| **Brain regions corrected by FDR** | |
| --- | --- |
| 7Networks_LH_Vis_11 | 7Networks_RH_Vis_15 |
| 7Networks_LH_Vis_15 | 7Networks_RH_Vis_19 |
| 7Networks_LH_Vis_22 | 7Networks_RH_Vis_28 |
| 7Networks_LH_Vis_3 | 7Networks_RH_SomMot_10 |
| 7Networks_LH_Vis_30 | 7Networks_RH_SomMot_28 |
| 7Networks_LH_SomMot_7 | 7Networks_RH_DorsAttn_Posterior_2 |
| 7Networks_LH_SomMot_15 | 7Networks_RH_DorsAttn_Posterior_5 |
| 7Networks_LH_SomMot_23 | 7Networks_RH_DorsAttn_Posterior_6 |
| 7Networks_LH_DorsAttn_Posterior_2 | 7Networks_RH_DorsAttn_Posterior_8 |
| 7Networks_LH_DorsAttn_Posterior_9 | 7Networks_RH_DorsAttn_Posterior_9 |
| 7Networks_LH_DorsAttn_Posterior_11 | 7Networks_RH_DorsAttn_Posterior_13 |
| 7Networks_LH_SalVentAttn_Parietal operculum_1 | 7Networks_RH_SalVentAttn_Temporal occipital/Parietal_4 |
| 7Networks_LH_SalVentAttn_Temporal occipital_1 | 7Networks_RH_SalVentAttn_Frontal operculum/Insula_5 |
| 7Networks_LH_SalVentAttn_Medial_2 | 7Networks_RH_SalVentAttn_Med_2 |
| 7Networks_LH_SalVentAttn_Medial_4 | 7Networks_RH_Limbic_Orbital frontal cortex_4 |
| 7Networks_LH_SalVentAttn_Medial_5 | 7Networks_RH_Cont_Parietal_4 |
| 7Networks_LH_Limbic_Temporal pole_1 | 7Networks_RH_Cont_Parietal_6 |
| 7Networks_LH_Limbic_Temporal pole_5 | 7Networks_RH_Cont_Ventral prefrontal cortex_1 |
| 7Networks_LH_Cont_Parietal_1 | 7Networks_RH_Cont_Lateral prefrontal cortex_2 |
| 7Networks_LH_Cont_Orbital frontal cortex_1 | 7Networks_RH_Cont_Lateral prefrontal cortex_4 |
| 7Networks_LH_Cont_Precuneus_1 | 7Networks_RH_Cont_Lateral prefrontal cortex_11 |
| 7Networks_LH_Default_Temporal_1 | 7Networks_RH_Default_Parietal_4 |
| 7Networks_LH_Default_Temporal_6 | 7Networks_RH_Default_Ventral prefrontal cortex_3 |
| 7Networks_LH_Default_Prefrontal cortex_1 | 7Networks_RH_Default_Dorsal prefrontal cortex/Medial prefrontal cortex_4 |
| 7Networks_LH_Default_Prefrontal cortex_5 | 7Networks_RH_Default_Precuneus posterior cingulate cortex_4 |
| 7Networks_LH_Default_Prefrontal cortex_10 |  |
| 7Networks_LH_Default_Prefrontal cortex_12 |  |
| 7Networks_LH_Default_Prefrontal cortex_13 |  |
| 7Networks_LH_Default_Precuneus posterior cingulate cortex_3 |  |

*Note: Table cells colored in red represent brain regions showing cortical thickness increase.*

**Table S2. Specific epicenter regions**

| **The epicenter regions of cortical thinning** | | **MNI coordinates** | | | | | |
| --- | --- | --- | --- | --- | --- | --- | --- |
| 7Networks_LH_DorsAttn_Posterior_9 | | -35.143232 | | -46.028421 | | 42.892598 | |
| 7Networks_LH_SalVentAttn_Parietal operculum_2 | | -55.464299 | | -42.376425 | | 26.745992 | |
| 7Networks_LH_SalVentAttn_Temporal occipital_1 | | -52.708954 | | -52.959298 | | 8.174487 | |
| 7Networks_LH_Cont_Parietal_6 | | -46.430848 | | -41.04848 | | 44.878782 | |
| 7Networks_LH_Cont_Orbital frontal cortex_1 | | -26.671603 | | 49.133099 | | -12.808933 | |
| 7Networks_LH_Default_Temporal_6 | | -57.951685 | | -36.464391 | | -3.797215 | |
| 7Networks_LH_Default_Parietal_4 | | -46.230503 | | -62.515347 | | 30.114476 | |
| 7Networks_LH_Default_Prefrontal cortex_5 | | -45.265206 | | 31.95898 | | -8.698243 | |
| 7Networks_RH_DorsAttn_Posterior_11 | | 35.793119 | | -45.551138 | | 44.788534 | |
| 7Networks_RH_SalVentAttn_Temporal occipital/Parietal_1 | | 54.882543 | | -47.987556 | | 9.351047 | |
| 7Networks_RH_SalVentAttn_Temporal occipital/Parietal_4 | | 56.398879 | | -33.049157 | | 24.772329 | |
| 7Networks_RH_SalVentAttn_Temporal occipital/Parietal_7 | | 56.034536 | | -41.994846 | | 36.306428 | |
| 7Networks_RH_SalVentAttn_Frontal operculum/Insula_5 | | 37.274558 | | 22.495904 | | 5.190173 | |
| 7Networks_RH_SalVentAttn_Lateral prefrontal cortex_1 | | 32.398763 | | 42.897544 | | 25.616167 | |
| 7Networks_RH_Cont_Parietal_2 | | 50.287592 | | -46.132659 | | 44.135887 | |
| 7Networks_RH_Cont_Parietal_4 | | 49.646164 | | -36.029181 | | 45.545607 | |
| 7Networks_RH_Cont_Parietal_5 | | 42.827951 | | -45.720442 | | 43.923496 | |
| 7Networks_RH_Cont_Lateral prefrontal cortex_4 | | 45.134683 | | 39.20703 | | 5.891746 | |
| 7Networks_RH_Cont_Lateral prefrontal cortex_11 | | 37.959126 | | 29.899234 | | 35.79773 | |
| 7Networks_RH_Default_Parietal_2 | | 46.927709 | | -64.444091 | | 21.037126 | |
| 7Networks_RH_Default_Parietal_3 | | 50.564768 | | -56.074895 | | 25.843074 | |
| 7Networks_RH_Default_Parietal_4 | | 53.785974 | | -49.641015 | | 30.60286 | |
| 7Networks_RH_Default_Ventral prefrontal cortex_1 | | 32.614421 | | 22.463342 | | -16.636599 | |
| 7Networks_RH_Default_Ventral prefrontal cortex_3 | | 47.077059 | | 32.945917 | | -5.695032 | |
| **The epicenter regions of cortical thickening** | | **MNI coordinates** | | | | | |
| 7Networks_LH_Vis_9 | | -14.281058 | | -87.614426 | | -11.789189 | |
| 7Networks_LH_Vis_11 | | -6.959566 | | -74.95243 | | -2.50914 | |
| 7Networks_LH_Vis_15 | | -10.316175 | | -96.151613 | | -4.071397 | |
| 7Networks_LH_Vis_18 | | -5.902035 | | -87.34977 | | 1.17758 | |
| 7Networks_LH_Vis_19 | | -24.022328 | | -94.296507 | | 5.977911 | |
| 7Networks_LH_Vis_21 | | -9.126291 | | -75.735344 | | 8.646087 | |
| 7Networks_LH_Vis_22 | | -20.004818 | | -63.250265 | | 5.852453 | |
| 7Networks_LH_SomMot_14 | | -50.609014 | | -10.377459 | | 28.875415 | |
| 7Networks_LH_SomMot_17 | | -46.485826 | | -16.879435 | | 38.24947 | |
| 7Networks_LH_SomMot_19 | | -38.88288 | | -15.294686 | | 46.034419 | |
| 7Networks_LH_SomMot_22 | | -36.885765 | | -25.450581 | | 49.702388 | |
| 7Networks_LH_SomMot_28 | | -32.085183 | | -30.434727 | | 59.084075 | |
| 7Networks_LH_SomMot_35 | | 17.794204 | | -32.142135 | | 64.980673 | |
| 7Networks_RH_Vis_6 | | 20.882446 | | -72.869103 | | -8.460266 | |
| 7Networks_RH_Vis_8 | | 18.703391 | | -86.517981 | | -9.833509 | |
| 7Networks_RH_Vis_11 | | 8.407838 | | -71.95267 | | -0.536727 | |
| 7Networks_RH_Vis_15 | | 11.32164 | | -91.363218 | | -1.12434 | |
| 7Networks_RH_Vis_19 | | 10.909008 | | -74.902201 | | 8.86604 | |
| 7Networks_RH_Vis_20 | | 22.081931 | | -59.527185 | | 5.967709 | |
| 7Networks_RH_Vis_21 | | 23.183106 | | -96.377404 | | 7.807159 | |
| 7Networks_RH_SomMot_16 | | 57.335481 | | -6.764299 | | 26.836693 | |
| 7Networks_RH_SomMot_22 | | 42.940419 | | -10.769946 | | 45.542156 | |
| 7Networks_RH_SomMot_25 | | 40.362453 | | -21.464716 | | 50.335258 | |
| 7Networks_RH_SomMot_29 | | 33.076653 | | -27.774327 | | 57.979893 | |
| 7Networks_RH_SomMot_34 | | 20.778733 | | -30.308039 | | 63.567587 | |
| 7Networks_RH_SomMot_35 | | 22.762181 | | -35.476787 | | 67.167312 | |

**Table S3. Brain regions across different age groups, corrected using FDR**

| **10-13 years** | **12-15 years** | **14-17 years** |
| --- | --- | --- |
| 7Networks_LH_Vis_15 | 7Networks_LH_Vis_9 | 7Networks_LH_DorsAttn_Posterior_2 |
| 7Networks_RH_Vis_15 | 7Networks_LH_Vis_11 | 7Networks_LH_SalVentAttn__Parietal operculum_1 |
| 7Networks_LH_SomMot_9 | 7Networks_LH_Vis_15 | 7Networks_LH_Cont_Parietal_3 |
| 7Networks_LH_DorsAttn_Posterior_2 | 7Networks_LH_Vis_18 | 7Networks_LH_Default_Temporal_1 |
| 7Networks_LH_DorsAttn_Posterior_9 | 7Networks_LH_Vis_22 | 7Networks_RH_DorsAttn_Posterior_9 |
| 7Networks_LH_DorsAttn_Posterior_11 | 7Networks_LH_DorsAttn_Posterior_16 | 7Networks_RH_Cont_Parietal_6 |
| 7Networks_LH_SalVentAttn_Parietal operculum_2 | 7Networks_RH_Vis_19 | 7Networks_RH_Default_Precuneus posterior cingulate cortex_4 |
| 7Networks_LH_SalVentAttn_Frontal operculum/Insula_3 | 7Networks_LH_Vis_3 |  |
| 7Networks_LH_SalVentAttn_Frontal operculum/Insula_5 | 7Networks_LH_Vis_8 |  |
| 7Networks_LH_SalVentAttn_Medial_4 | 7Networks_LH_Vis_30 |  |
| 7Networks_LH_SalVentAttn_Medial_5 | 7Networks_LH_SomMot_7 |  |
| 7Networks_LH_Limbic_Orbital frontal cortex_2 | 7Networks_LH_SomMot_12 |  |
| 7Networks_LH_Limbic_TempPole_1 | 7Networks_LH_DorsAttn_Posterior_2 |  |
| 7Networks_LH_Limbic_TempPole_5 | 7Networks_LH_DorsAttn_Posterior_8 |  |
| 7Networks_LH_Cont_Parietal_1 | 7Networks_LH_DorsAttn_Posterior_9 |  |
| 7Networks_LH_Cont_Orbital frontal cortex_1 | 7Networks_LH_DorsAttn_Posterior_11 |  |
| 7Networks_LH_Default_Temporal_6 | 7Networks_LH_DorsAttn_Frontal eye fields_4 |  |
| 7Networks_LH_Default_Temporal_7 | 7Networks_LH_DorsAttn_Precentral ventral_1 |  |
| 7Networks_LH_Default_Temporal_9 | 7Networks_LH_SalVentAttn__Parietal operculum_1 |  |
| 7Networks_LH_Default_Temporal_10 | 7Networks_LH_SalVentAttn_Temporal occipital_1 |  |
| 7Networks_LH_Default_Prefrontal cortex_1 | 7Networks_LH_SalVentAttn_Frontal operculum/Insula_5 |  |
| 7Networks_LH_Default_Prefrontal cortex_5 | 7Networks_LH_SalVentAttn_Medial_2 |  |
| 7Networks_LH_Default_Prefrontal cortex_10 | 7Networks_LH_SalVentAttn_Medial_4 |  |
| 7Networks_LH_Default_Precuneus posterior cingulate cortex_7 | 7Networks_LH_SalVentAttn_Medial_5 |  |
| 7Networks_RH_Vis_22 | 7Networks_LH_SalVentAttn_Medial_7 |  |
| 7Networks_RH_Vis_28 | 7Networks_LH_Limbic_Temporal pole_1 |  |
| 7Networks_RH_SomMot_14 | 7Networks_LH_Limbic_Temporal pole_5 |  |
| 7Networks_RH_DorsAttn_Posterior_1 | 7Networks_LH_Cont_Parietal_1 |  |
| 7Networks_RH_DorsAttn_Posterior_6 | 7Networks_LH_Cont_Parietal_3 |  |
| 7Networks_RH_DorsAttn_Posterior_8 | 7Networks_LH_Cont_Orbital frontal cortex_1 |  |
| 7Networks_RH_DorsAttn_Posterior_9 | 7Networks_LH_Cont_Precuneus_1 |  |
| 7Networks_RH_SalVentAttn_TempOccPar_1 | 7Networks_LH_Default_Temporal_1 |  |
| 7Networks_RH_SalVentAttn_Frontal operculum/Insula_5 | 7Networks_LH_Default_Temporal_2 |  |
| 7Networks_RH_SalVentAttn_Medial_5 | 7Networks_LH_Default_Temporal_6 |  |
| 7Networks_RH_SalVentAttn_Medial_7 | 7Networks_LH_Default_Temporal_9 |  |
| 7Networks_RH_Limbic_Orbital frontal cortex_4 | 7Networks_LH_Default_Temporal_10 |  |
| 7Networks_RH_Cont_Parietal_2 | 7Networks_LH_Default_Parietal_1 |  |
| 7Networks_RH_Cont_Parietal_4 | 7Networks_LH_Default_Prefrontal cortex_1 |  |
| 7Networks_RH_Cont_Ventral prefrontal cortex_1 | 7Networks_LH_Default_Prefrontal cortex_5 |  |
| 7Networks_RH_Cont_Lateral prefrontal cortex_1 | 7Networks_LH_Default_Prefrontal cortex_9 |  |
| 7Networks_RH_Cont_Lateral prefrontal cortex_2 | 7Networks_LH_Default_Prefrontal cortex_10 |  |
| 7Networks_RH_Cont_Lateral prefrontal cortex_4 | 7Networks_LH_Default_Prefrontal cortex_12 |  |
| 7Networks_RH_Cont_Lateral prefrontal cortex_7 | 7Networks_LH_Default_Prefrontal cortex_13 |  |
| 7Networks_RH_Cont_Lateral prefrontal cortex_11 | 7Networks_LH_Default_Precuneus posterior cingulate cortex_3 |  |
| 7Networks_RH_Default_Temporal_5 | 7Networks_RH_Vis_14 |  |
| 7Networks_RH_Default_Temporal_8 | 7Networks_RH_SomMot_1 |  |
| 7Networks_RH_Default_Ventral prefrontal cortex_2 | 7Networks_RH_SomMot_12 |  |
| 7Networks_RH_Default_Ventral prefrontal cortex_3 | 7Networks_RH_SomMot_17 |  |
| 7Networks_RH_Default_Ventral prefrontal cortex_4 | 7Networks_RH_SomMot_28 |  |
| 7Networks_RH_Default_Dorsal prefrontal cortex/Medial prefrontal cortex_3 | 7Networks_RH_DorsAttn_Posterior_2 |  |
| 7Networks_RH_Default_Dorsal prefrontal cortex/Medial prefrontal cortex_5 | 7Networks_RH_DorsAttn_Posterior_5 |  |
|  | 7Networks_RH_DorsAttn_Posterior_8 |  |
|  | 7Networks_RH_DorsAttn_Posterior_9 |  |
|  | 7Networks_RH_DorsAttn_Posterior_13 |  |
|  | 7Networks_RH_SalVentAttn_Temporal occipital/parietal_4 |  |
|  | 7Networks_RH_SalVentAttn_Temporal occipital/parietal_7 |  |
|  | 7Networks_RH_SalVentAttn_Frontal operculum/Insula_5 |  |
|  | 7Networks_RH_SalVentAttn_Frontal operculum/Insula_6 |  |
|  | 7Networks_RH_SalVentAttn_Lateral prefrontal cortex_1 |  |
|  | 7Networks_RH_SalVentAttn_Medial_1 |  |
|  | 7Networks_RH_SalVentAttn_Medial_2 |  |
|  | 7Networks_RH_Limbic_Orbital frontal cortex_4 |  |
|  | 7Networks_RH_Cont_Parietal_4 |  |
|  | 7Networks_RH_Cont_Parietal_6 |  |
|  | 7Networks_RH_Cont_Ventral prefrontal cortex_1 |  |
|  | 7Networks_RH_Cont_Lateral prefrontal cortex_1 |  |
|  | 7Networks_RH_Cont_Lateral prefrontal cortex_2 |  |
|  | 7Networks_RH_Cont_Lateral prefrontal cortex_11 |  |
|  | 7Networks_RH_Default_Parietal_4 |  |
|  | 7Networks_RH_Default_Temporal_1 |  |
|  | 7Networks_RH_Default_Ventral prefrontal cortex_2 |  |
|  | 7Networks_RH_Default_Ventral prefrontal cortex_3 |  |
|  | 7Networks_RH_Default_Dorsal prefrontal cortex/Medial prefrontal cortex_4 |  |
|  | 7Networks_RH_Default_Precuneus posterior cingulate cortex_3 |  |
|  | 7Networks_RH_Default_Precuneus posterior cingulate cortex_4 |  |
|  | 7Networks_RH_Default_Precuneus posterior cingulate cortex_8 |  |

**Table S4. The epicenters across different age groups.**

| 8-11 years | 10-13 years | 12-15 years | 14-17 years |
| --- | --- | --- | --- |
| LH_Vis_5 | LH_Vis_9 | LH_Vis_9 | LH_Vis_9 |
| LH_Vis_9 | LH_Vis_11 | LH_Vis_11 | LH_Vis_11 |
| LH_Vis_11 | LH_Vis_12 | LH_Vis_15 | LH_Vis_15 |
| LH_Vis_15 | LH_Vis_15 | LH_Vis_18 | LH_Vis_16 |
| LH_Vis_22 | LH_Vis_18 | LH_Vis_21 | LH_Vis_18 |
| LH_SomMot_17 | LH_Vis_21 | LH_Vis_22 | LH_Vis_19 |
| LH_SomMot_24 | LH_Vis_22 | LH_Vis_25 | LH_Vis_21 |
| LH_SomMot_35 | LH_Vis_25 | LH_SomMot_17 | LH_Vis_22 |
| LH_Default_Precuneus posterior cingulate cortex_4 | LH_SomMot_5 | LH_SomMot_19 | LH_SomMot_14 |
| RH_Vis_9 | LH_SomMot_17 | LH_SomMot_20 | LH_SomMot_17 |
| RH_Vis_10 | LH_SomMot_19 | LH_SomMot_22 | LH_SomMot_19 |
| RH_Vis_13 | LH_SomMot_22 | LH_SomMot_26 | LH_SomMot_20 |
| RH_Vis_15 | LH_SomMot_24 | LH_SomMot_28 | LH_SomMot_22 |
| RH_Vis_16 | LH_SomMot_26 | LH_SomMot_35 | LH_SomMot_28 |
| RH_Vis_18 | LH_SomMot_28 | RH_Vis_6 | LH_SomMot_29 |
| RH_Vis_21 | LH_SomMot_31 | RH_Vis_8 | LH_SomMot_35 |
| RH_Vis_22 | RH_Vis_8 | RH_Vis_11 | RH_Vis_2 |
| RH_Vis_24 | RH_Vis_11 | RH_Vis_15 | RH_Vis_6 |
| RH_Vis_25 | RH_Vis_13 | RH_Vis_19 | RH_Vis_8 |
| RH_Vis_26 | RH_Vis_15 | RH_Vis_21 | RH_Vis_11 |
| RH_SomMot_16 | RH_Vis_19 | RH_SomMot_22 | RH_Vis_15 |
| RH_SomMot_29 | RH_Vis_21 | RH_SomMot_25 | RH_Vis_19 |
| RH_SomMot_34 | RH_Vis_25 | RH_SomMot_29 | RH_Vis_20 |
| RH_SomMot_35 | RH_SomMot_25 | RH_SomMot_32 | RH_SomMot_21 |
| RH_Default_Precuneus posterior cingulate cortex_1 | RH_SomMot_29 | RH_SomMot_34 | RH_SomMot_25 |
| RH_Default_Precuneus posterior cingulate cortex_3 | RH_SomMot_34 | RH_SomMot_35 | RH_SomMot_32 |
| LH_SomMot_4 | RH_SomMot_35 | RH_SomMot_40 | RH_SomMot_34 |
| LH_Cont_Orbital frontal cortex_1 | RH_SomMot_40 | LH_DorsAttn_Posterior_9 | LH_DorsAttn_Posterior_9 |
| LH_Cont_Lateral prefrontal cortex_1 | LH_SomMot_4 | LH_SalVentAttn_Parietal operculum_2 | LH_DorsAttn_Precentral ventral_1 |
| LH_Cont_Lateral prefrontal cortex_2 | LH_SalVentAttn_Frontal operculum/Insula_3 | LH_SalVentAttn_Temporal occipital_1 | LH_SalVentAttn_Parietal operculum_1 |
| LH_Cont_Lateral prefrontal cortex_6 | LH_SalVentAttn_Frontal operculum/Insula_5 | LH_Cont_Parietal_2 | LH_SalVentAttn_Temporal occipital_1 |
| LH_Default_Prefrontal cortex_1 | LH_SalVentAttn_Frontal operculum/Insula_6 | LH_Cont_Parietal_6 | LH_Limbic_Temporal occipital_7 |
| LH_Default_Prefrontal cortex_5 | LH_SalVentAttn_Frontal operculum/Insula_7 | LH_Default_Parietal_1 | LH_Cont_Parietal_2 |
| LH_Default_Prefrontal cortex_7 | LH_Limbic_Orbital frontal cortex_2 | LH_Default_Parietal_2 | LH_Cont_Parietal_3 |
| RH_SomMot_5 | LH_Cont_Orbital frontal cortex_1 | LH_Default_Parietal_4 | LH_Cont_Parietal_6 |
| RH_SalVentAttn_Frontal operculum/Insula_3 | LH_Default_Prefrontal cortex_1 | LH_Default_Prefrontal cortex_5 | LH_Default_Temporal_6 |
| RH_SalVentAttn_Frontal operculum/Insula_4 | LH_Default_Prefrontal cortex_5 | RH_SalVentAttn_Temporal occipital/Parietal_4 | LH_Default_Parietal_1 |
| RH_SalVentAttn_Medial_6 | LH_Default_Prefrontal cortex_10 | RH_SalVentAttn_Temporal occipital/Parietal_7 | LH_Default_Parietal_4 |
| RH_Limbic_Orbital frontal cortex_4 | RH_SalVentAttn_Frontal operculum/Insula_5 | RH_SalVentAttn_Frontal operculum/Insula_5 | LH_Default_Prefrontal cortex_17 |
| RH_Limbic_Temporal pole_3 | RH_SalVentAttn_Frontal operculum/Insula_6 | RH_Cont_Parietal_2 | LH_Default_Prefrontal cortex_22 |
| RH_Limbic_Temporal pole_5 | RH_Limbic_Orbital frontal cortex_4 | RH_Cont_Parietal_4 | RH_DorsAttn_Posterior_2 |
| RH_Cont_Lateral prefrontal cortex_1 | RH_Cont_Ventral prefrontal cortex_1 | RH_Cont_Lateral prefrontal cortex_11 | RH_DorsAttn_Posterior_3 |
| RH_Cont_Lateral prefrontal cortex_2 | RH_Cont_Lateral prefrontal cortex_2 | RH_Default_Parietal_2 | RH_DorsAttn_Posterior_4 |
| RH_Cont_Lateral prefrontal cortex_8 | RH_Cont_Lateral prefrontal cortex_7 | RH_Default_Parietal_4 | RH_DorsAttn_Posterior_5 |
| RH_Default_Ventral prefrontal cortex_1 | RH_Cont_Lateral prefrontal cortex_8 |  | RH_DorsAttn_Posterior_8 |
| RH_Default_Ventral prefrontal cortex_2 | RH_Default_Ventral prefrontal cortex_1 |  | RH_DorsAttn_Posterior_9 |
| RH_Default_Ventral prefrontal cortex_3 | RH_Default_Ventral prefrontal cortex_2 |  | RH_DorsAttn_Posterior_10 |
| RH_Default_Dorsal prefrontal cortex/Medial posterior prefrontal cortex_5 | RH_Default_Ventral prefrontal cortex_3 |  | RH_DorsAttn_Posterior_11 |
|  | RH_Default_Ventral prefrontal cortex_4 |  | RH_DorsAttn_Posterior_13 |
|  |  |  | RH_SalVentAttn_Temporal occipital/Parietal_4 |
|  |  |  | RH_SalVentAttn_Temporal occipital/Parietal_7 |
|  |  |  | RH_SalVentAttn_Frontal operculum/Insula_3 |
|  |  |  | RH_Limbic_Temporal pole_5 |
|  |  |  | RH_Cont_Parietal_1 |
|  |  |  | RH_Cont_Parietal_4 |
|  |  |  | RH_Cont_Parietal_5 |
|  |  |  | RH_Cont_Parietal_6 |
|  |  |  | RH_Default_Parietal_2 |
|  |  |  | RH_Default_Parietal_3 |
|  |  |  | RH_Default_Parietal_4 |
|  |  |  | RH_Default_Parietal_5 |
|  |  |  | RH_Default_Precuneus posterior cingulate cortex_6 |

*Note: Red-marked areas indicating thickened cortical regions and unmarked areas indicating thinned cortical regions*
